# Supplementary material for: Mono N,C,N-pincer complexes of titanium, vanadium and niobium. Synthesis, structure and catalytic activity in olefin polymerisation
Source: Royal Society of Chemistry journal article supplement (doi:10.1039/c1dt10482a), 2011-01-01
Supplement: c1dt10482a.pdf [file c1dt10482a.pdf]

# Mono N,C,N'-Pincer Complexes of Titanium, Vanadium and Niobium. Synthesis, Structure and catalytic activity in olefin polymerization.

*Alexey V. Chuchuryukin,<sup>†, ‡</sup> Rubin Huang,<sup>#, ‡</sup> Ernst E. van Faassen,<sup>†</sup> Gerard P. M. van Klink,<sup>†</sup> Martin  
Lutz,<sup>§</sup> John C. Chadwick,<sup>#, ‡</sup> Anthony L. Spek,<sup>§, ||</sup> and Gerard van Koten\*,<sup>†</sup>.*

Supporting Information

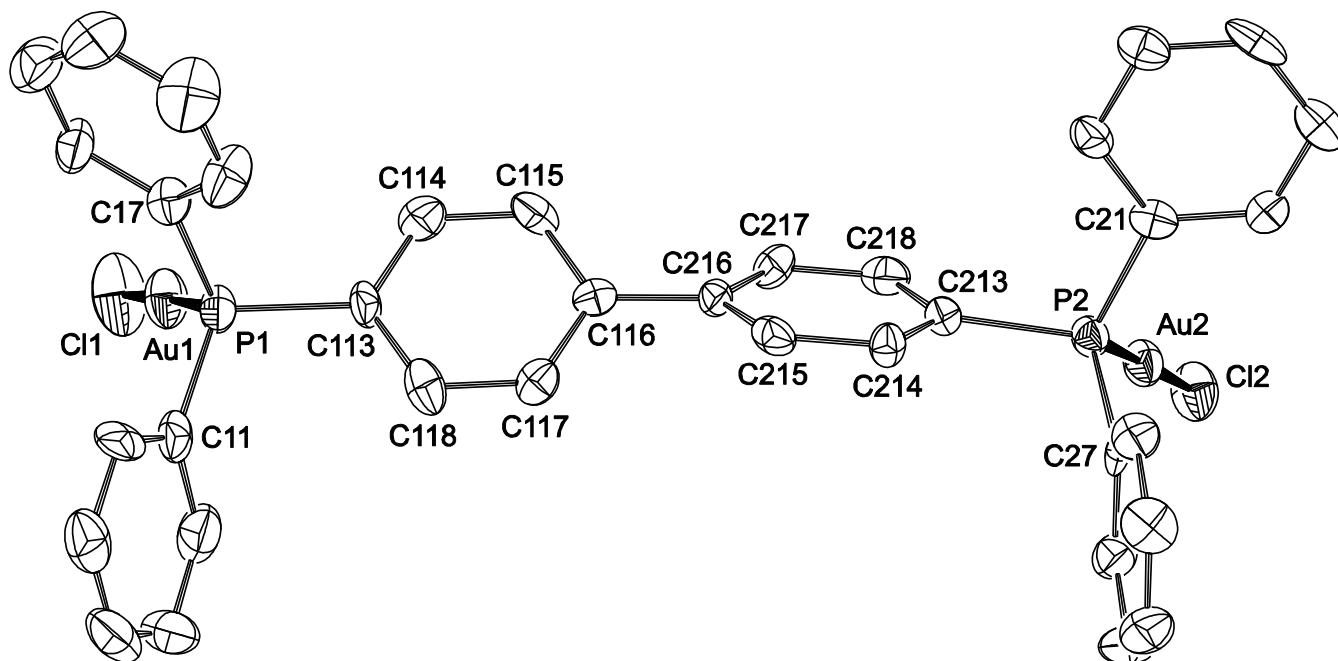

**Figure S1.** Displacement ellipsoid plot (50% probability) of **2** in the crystal. Hydrogen atoms are omitted for clarity. Selected bond lengths (Å), bond angles (°) and torsion angles (°): Au(1)–Cl(1) 2.292(3), Au(1)–P(1) 2.228(2), Au(2)–Cl(2) 2.285(2), Au(2)–P(2) 2.229(2), Cl(1)–Au(1)–P(1) 177.11(9), Cl(2)–Au(2)–P(2) 178.96(8), C(117)–C(116)–C(216)–C(217) 135.9(8), C(115)–C(116)–C(216)–C(215) 143.7(8).

**X-ray crystal structure determination of 2.**  $C_{36}H_{28}Au_2Cl_2P_2$  + disordered solvent, Fw = 987.36 [\*], colourless plate, 0.15 x 0.15 x 0.03 mm<sup>3</sup>, monoclinic, P2<sub>1</sub>/c (no. 14), a = 17.3144(4), b = 11.9885(3), c = 17.2423(5) Å,  $\beta$  = 103.3920(12)°, V = 3481.73(16) Å<sup>3</sup>, Z = 4, D<sub>x</sub> = 1.884 g/cm<sup>3</sup>[\*],  $\mu$  = 8.69 mm<sup>-1</sup>[\*]. 28598 Reflections were measured on a Nonius KappaCCD diffractometer with rotating anode (graphite monochromator,  $\lambda$  = 0.71073 Å) up to a resolution of  $(\sin \theta/\lambda)_{\max}$  = 0.56 Å<sup>-1</sup> at a temperature of 150(2) K. Intensity integration was performed with HKL2000<sup>[501]</sup>. The SADABS program<sup>[502]</sup> was used for absorption correction and scaling based on multiple measured reflections (0.50-0.77 correction range). 5174 Reflections were unique ( $R_{\text{int}}$  = 0.076), of which 3697 were observed [ $I > 2\sigma(I)$ ]. The structure was solved with automated Patterson methods using the program DIRDIF-99<sup>[503]</sup>. The structure was refined with SHELXL-97<sup>[504]</sup> against  $F^2$  of all reflections. Non hydrogen atoms were refined with anisotropic

displacement parameters. Hydrogen atoms were introduced in calculated positions and refined with a riding model. The crystal structure contains voids ( $365 \text{ \AA}^3$  / unit cell) filled with disordered solvent molecules. Their contribution to the structure factors was secured by back-Fourier transformation with the SQUEEZE routine of PLATON<sup>[505]</sup> resulting in 69 electrons / unit cell. 379 Parameters were refined with no restraints. R1/wR2 [ $I > 2\sigma(I)$ ]: 0.0381 / 0.0683. R1/wR2 [all refl.]: 0.0689 / 0.0743. S = 1.010. Residual electron density between -0.88 and  $1.19 \text{ e/\AA}^3$ . Geometry calculations and checking for higher symmetry was performed with the PLATON program<sup>[505]</sup>.

[\*] Derived values do not contain the contribution of the disordered solvent.

## References

- [501] Otwinowski, Z., Minor, W., *Methods in Enzymology, Volume 276* (C.W. Carter, Jr. & R.M. Sweet, Eds) Academic Press (1997) 307-326.
- [502] G. M. Sheldrick (1999). SADABS: Area-Detector Absorption Correction, v2.10, Universität Göttingen, Germany.
- [503] Beurskens, P.T., Admiraal, G., Beurskens, G., Bosman, W.P., Garcia-Granda, S., Gould, R.O., Smits, J.M.M., Smykalla, C. (1999) The DIRDIF99 program system, Technical Report of the Crystallography Laboratory, University of Nijmegen, The Netherlands.
- [504] G. M. Sheldrick, *Acta Cryst.* **2008**, *A64*, 112-122.
- [505] A. L. Spek, *Acta Cryst.* (2009). **D65**, 148-155
